# Supplementary material for: Single-digit Salmonella detection with the naked eye using bio-barcode immunoassay coupled with recombinase polymerase amplification and a CRISPR-Cas12a system
Source: Royal Society of Chemistry journal article supplement (doi:10.1039/d1an00717c), 2021-01-01
Supplement: d1an00717c1.pdf [file d1an00717c1.pdf]

1 **Supplementary information:**

2

3

4

5 **Single-digit *Salmonella* detection with the naked eye using bio-**  
6 **barcode immunoassay coupled with recombinase polymerase**  
7 **amplification and CRISPR-Cas12a system**

8

9 Qiqi Cai,<sup>a</sup> Rui Wang,<sup>b</sup> Zhaohui Qiao<sup>a\*</sup> and Wenge Yang<sup>a</sup>

10 a College of Food and Pharmaceutical Sciences, Ningbo University, Ningbo  
11 315800, China

12 b State Key Laboratory of Genetic Engineering, School of Life Sciences,  
13 Zhongshan Hospital, Fudan University, Shanghai, 200432, China

14 \* Email: qiaozhaohui@nbu.edu.cn

15

## 16 **Materials and methods**

### 17 **Bacterial growth**

18 The stock culture of *S. Typhimurium*, *E. coli* and *L. monocytogenes* were grown  
19 in Brain Heart Infusion (BHI) broth. After 18 h incubation, 1 mL of bacteria solution  
20 was collected by centrifugation at 6000 rpm for 8 min to remove the supernatant and  
21 washed with PBST. By plating bacteria on Xylose-Lysine-Desoxycholate (XLD) agar  
22 plates, the number of bacteria per milliliter can be acquired via counting related colony  
23 forming unit (CFU) after overnight incubation at 37°C.

### 24 **Standard RPA reaction assay**

25 Standard RPA reactions were assembled according to the instructions of the  
26 manufacturer (TwistAmp Basic kit, TwistDx). Briefly, each 25 µL reactions contained  
27 14.75 µL of rehydration buffer, 1.2 µL of 10 µM forward primer, 1.2 µL of 10 µM  
28 reverse primer, 3 µL of bio-barcode DNA, 1.25 µL of 280 mM magnesium acetate  
29 (MgOAc), a lyophilized enzyme pellet, and sterile water up to 25 µL. The mixture was  
30 incubated at 37°C for 5 min.

### 31 **ssDNA-triggered CRISPR-Cas12a system**

32 The ssDNA-triggered CRISPR-Cas12a system contained 1 µL 10 µM crRNA, 5  
33 µL 1 µM Cas12a, 2 µL 2 µM quenched fluorescent ssDNA reporter, 10 U of RNase  
34 inhibitor, and 2 µL of NEBuffer 2.1 with 3 µL of amplified products or ssDNA and  
35 RNase free ddH<sub>2</sub>O up to 20 µL. The reaction was performed at 37 °C for 10 min.

36

37 **Characterization of the AuNP probes**

38 Transmission electron microscope (TEM) imaging showed that both unmodified  
39 and barcode AuNPs exhibit great dispersion with diameter of 12.5 nm (Fig. S1). A  
40 shadow coating was observed after bare AuNPs (Fig. S1A) being coated with antibody  
41 and DNA (Fig. S1B) due to the presence of a coating material with a lower electron  
42 density.

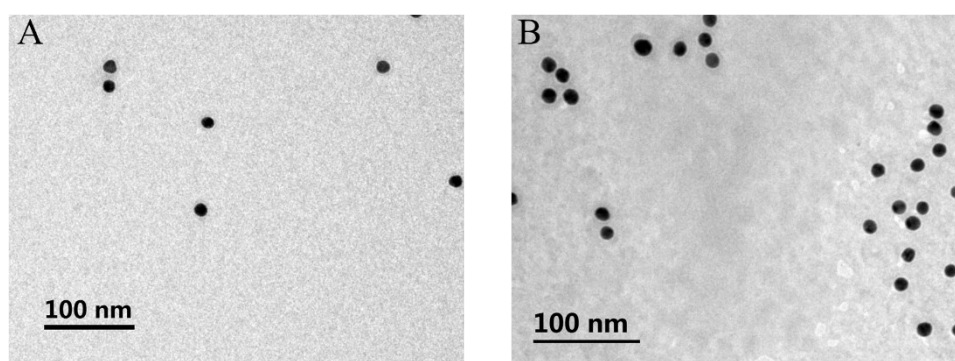

43  
44 **Fig. S1** TEM imaging of bare AuNPs(A) and barcode AuNPs(B).

45

46

47 **The impact of MNPs, AuNPs, and bacteria to RPA and CRISPR-Cas12a**

48 **system**

49 To testify the impact of BCA components on the RPA and CRISPR-Cas12a  
50 system, we added individual components of BCA reagents, including MNPs, AuNPs,  
51 and bacteria into the standard RPA reaction system and CRISPR-Cas12a system,  
52 respectively. Agarose gel electrophoresis revealed that all samples contained the  
53 expected amplified DNA bands (Fig. S2A), illustrating the components of BCA have  
54 no effect on RPA. Next, we investigated the effects on the CRISPR-Cas12a system. As  
55 shown in Fig. S2B, there were almost no difference between standard CRISPR-Cas12a  
56 system and with different components from BCA, which proved the MNPs, bacteria,  
57 and AuNPs would not affect the CRISPR-Cas12a system.

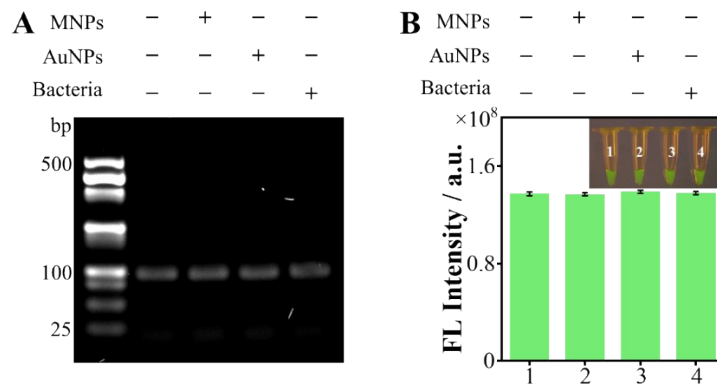

58

59 **Fig. S2** The impact of MNPs, AuNPs, and bacteria on RPA and CRISPR-Cas12a

60 system. (A) Agarose gel electrophoresis of RPA products with different components

61 from BCA. (B) Fluorescence intensity of CRISPR-Cas12a system with different

62 components of BCA and visual detection under blue light, photographed by smart

63 phone.

64

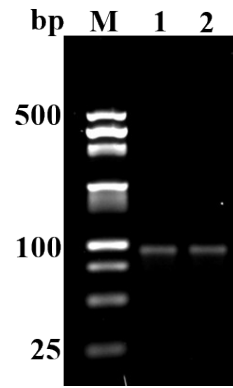

65

66 **Fig. S3** The effect of DTT on RPA reaction. Lane M: the molecular weight marker.

67 Lane 1: standard RPA reaction. Lane 2: standard RPA reaction with DTT.

68

69

70 **Optimization of antibody concentration**

71 The antibody concentration for preparation of barcode AuNPs has a great  
72 influence on their affinity toward target bacteria due to the site competition between  
73 antibody and DNA. According to the previous report<sup>1</sup>, the concentration of bio-barcode  
74 DNA was fixed at 3  $\mu\text{M}$  (ratio of  $\sim 300:1$ ) which is excess for AuNPs. At a constant  
75 DNA concentration, the different concentrations of antibody (0.05, 0.1, 0.15, and 0.2  
76  $\text{mg mL}^{-1}$ ) were tested. As shown in Fig. S4, the fluorescence intensity of positive  
77 sample was the highest at the concentration of 0.1  $\text{mg mL}^{-1}$  and gradually decreased  
78 with continually increase of the antibody concentration, which may be caused by the  
79 decreasing content of bio-barcode DNA on AuNPs. Thus, 0.1  $\text{mg mL}^{-1}$  was identified  
80 as the optimum antibody concentration for preparation of barcode AuNPs.

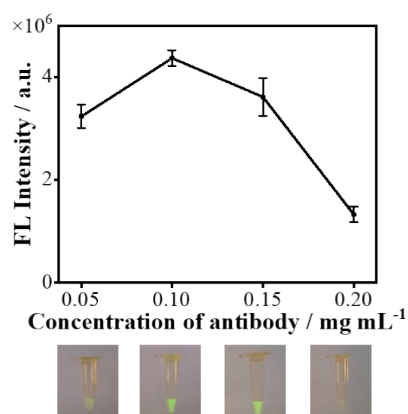

81

82 **Fig. S4** Optimization of the concentration of antibody.

83

84

85

86 **Optimization of the concentration of barcode AuNPs**

87 In the formation of sandwich structure, the concentration of barcode AuNPs could  
88 directly affects the amount of barcode AuNPs attaching on the surface of bacteria and  
89 the efficiency of subsequent signal amplification. Therefore, the effect of the amount  
90 of barcode AuNPs ranging from 5 to 35  $\mu\text{L}$  on the fluorescent signal was investigated.  
91 As shown in Fig. S5, the fluorescence intensity of positive sample increased with the  
92 amount of barcode AuNPs. For negative control, the fluorescent intensity was  
93 negligible until the amount of barcode AuNPs was up to 35  $\mu\text{L}$ , which means the  
94 nonspecific adsorption happened when the amount of barcode AuNPs was too high.  
95 Furthermore, the  $F/F_0$  value (fluorescent intensity of positive vs. its negative control)  
96 also demonstrated the amount of 20  $\mu\text{L}$  was optimal. Therefore, 20  $\mu\text{L}$  of barcode  
97 AuNPs was used in the following study.

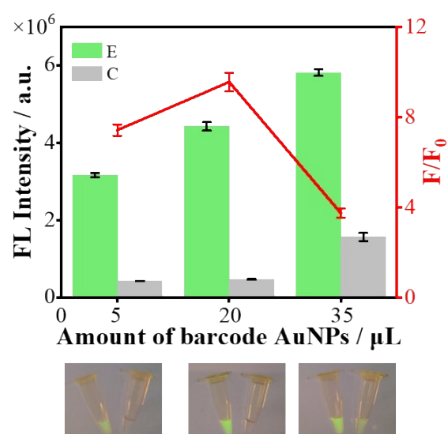

98

99 **Fig. S5** Optimization of the amount of barcode AuNPs. The concentration of *S.*

100 Typhimurium was  $10^3$  CFU  $\text{mL}^{-1}$ .

101

102 **Optimization of the concentration of enzyme for RPA reaction**

103 The concentration of enzyme for RPA reaction was optimized. Considering that  
104 no detailed concentration of enzyme was provided in the RPA kit, one lyophilized  
105 enzyme pellet was used as an enzyme unit. Different amount of lyophilized enzyme  
106 (1/10, 1/8, 1/6, 1/4, and 1/2 unit) were employed in the optimized experiments. As  
107 shown in Fig. S6, the fluorescence intensity of both positive sample and negative  
108 control are positively correlated to the concentration of lyophilized enzyme. When the  
109 amount of lyophilized enzyme was up to 1/4 unit, the fluorescence signal of negative  
110 control sample can be visualized, which means the concentration of 1/4 or more will  
111 lead to obvious background signal and have adverse effect on the sensitivity of  
112 detection. In addition, the  $F/F_0$  value of 1/6 unit group was the highest. Therefore, 1/6  
113 unit was selected as the optimal enzyme concentration and used in the following  
114 experiments.

115

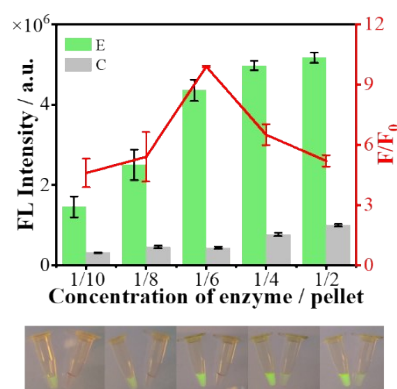

116

117 **Fig. S6** Optimization of the concentration of enzyme of RPA reaction. The  
118 concentration of *S. Typhimurium* was  $10^3$  CFU  $\text{mL}^{-1}$ .

119



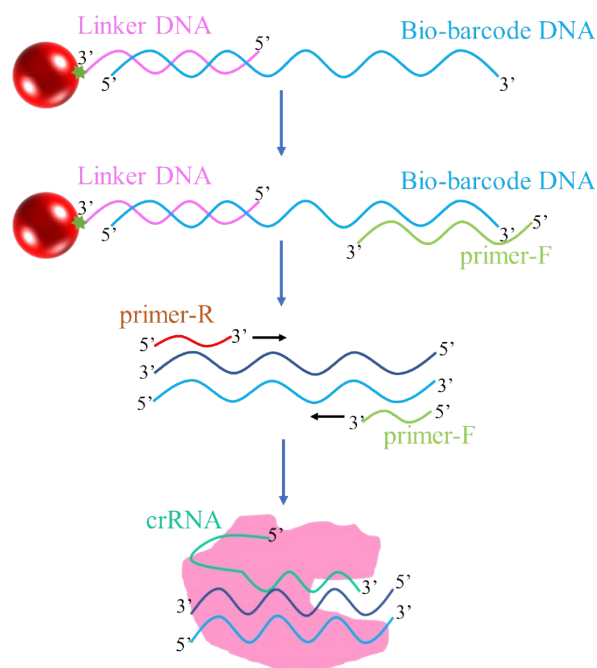

120

121 **Fig. S7** The scheme RPA reaction of barcode AuNPs. The colors of different DNA

122 are same with their sequences colors in Table S1.

123 **Table S1** Sequence information for the nucleic acids used in this study.

| Nucleic acids<br>name | Sequences (5'-3')                                                      | Length<br>(bp) |
|-----------------------|------------------------------------------------------------------------|----------------|
| Linker DNA            | ACAACATACGAGCCGGAAGCATAAAGT-C6-SH                                      | 27             |
| Bio-barcode DNA       | ACTTTATGCTTCCGGCTCGTATGTTGTGTGTTTCTACTGAATTCGTCGTATTACAATTCCTGCGTCTTTA | 89             |
| ssDNA                 | ACTTTATGCTTCCGGCTCGTATGTTGTGAATTCAGTA-GAAAGTTGCGATAA                   | 51             |
| RPA primer-F          | TAAAACGACGGCCAGTGAATTGTAATACGAC                                        | 31             |
| RPA primer-R          | ACTTTATGCTTCCGGCTCGTATGTTGTGTG                                         | 30             |
| crRNA                 | GAAUUUCUACUGUUGUAGAUUAUCGCAACUUUCUACUGAAUUC                            | 43             |
| ssDNA reporter        | 6-FAM-TTATT-BHQ1                                                       | 5              |

124

125 **Table S2** Compare of detection limit of foodborne pathogen using different methods.

| Method         | Detection limit                                                                                                   | Signal output                             | Target                                                                                                                 | References |
|----------------|-------------------------------------------------------------------------------------------------------------------|-------------------------------------------|------------------------------------------------------------------------------------------------------------------------|------------|
| BCA            | 86 CFU mL <sup>-1</sup>                                                                                           | Fluorescence spectrophotometry            | <i>Staphylococcus aureus</i>                                                                                           | 2          |
| BCA            | 90 CFU mL <sup>-1</sup>                                                                                           | Fluorescence spectrophotometry            | <i>Shigella spp</i>                                                                                                    | 3          |
| BCA            | 1.07 × 10 <sup>2</sup> CFU mL <sup>-1</sup>                                                                       | Fluorescence detector                     | <i>B. melitensis 16M</i>                                                                                               | 4          |
| BCA            | 0.5 ng mL <sup>-1</sup> ( <i>Bacillus Anthracis</i> )<br>50 pg mL <sup>-1</sup> ( <i>Salmonella enteritidis</i> ) | Electrochemical element                   | Protective antigen A gene of <i>Bacillus anthracis</i> and the insertion element gene of <i>Salmonella enteritidis</i> | 5          |
| RPA-Cas12a-FS  | 10 copies                                                                                                         | Microplate reader or handheld fluorometer | <i>E. coli</i> ;<br><i>L. monocytogenes</i> ;<br><i>S. aureus</i> ;<br><i>V. parahaemolyticus</i>                      | 6          |
| RPA-Cas12a     | 1 CFU mL <sup>-1</sup>                                                                                            | Microplate reader                         | <i>E. coli</i> O157:H7                                                                                                 | 7          |
| RPA-Cas12a     | 4.48 fM                                                                                                           | Fluorescence detector                     | <i>Mycobacterium tuberculosis</i>                                                                                      | 8          |
| BCA-RPA-Cas12a | 1 CFU mL <sup>-1</sup>                                                                                            | Naked eye under blue light LED            | <i>S. Typhimurium</i>                                                                                                  | This work  |

126

127

128 **Notes and references**

- 129 1 B. Liu and J. Liu, *J. Am. Chem. Soc.*, 2017, **139**, 9471-9474.
- 130 2 A. Amini, M. Kamali, B. Amini, A. Najafi, A. Narmani, L. Hasani, J. Rashidiani,  
131 H. Kooshki, N. Elahi, *Int. J. Biol. Macromol.*, 2019, **124**, 1256-1263.
- 132 3 N. Elahi, M. Kamali, M. H. Baghersad and B. Amini, *Mater. Sci. Eng. C-Mater.*  
133 *Biol. Appl.*, 2019, **105**, 110113.
- 134 4 X. Li, C. Zhao, Y. Liu, Y. Li, F. Lian, D. Wang, Y. Zhang, J. Wang, X. Song, J. Li,  
135 Y. Yang and K. Xu, *Analyst*, 2019, **144**, 2704-2715.
- 136 5 D. Zhang, M. C. Huarng and E. C. Alcocilja, *Biosens. Bioelectron.*, 2010, **26**, 1736-  
137 1742.
- 138 6 H. Liu, J. Wang, H. Zeng, X. Liu, W. Jiang, Y. Wang, W. Ouyang, X. Tang, *Food*  
139 *Chem.*, 2021, **334**, 127608.
- 140 7 Y. Wang, Y. Ke, W. Liu, Y. Sun, X. Ding, *ACS Sens.*, 2020, **5**, 1427-1435.
- 141 8 H.P. Xu, X.L. Zhang, Z.X. Cai, X.Q. Dong, G. Chen, Z.L. Li, L.M. Qiu, L. He, B.  
142 Liang, X.L. Liu, J.F. Liu, *J. Mol. Diagn.*, 2020, **22**, 1020-1029.
